# Supplementary material for: R132H IDH1 sensitizes glioma to the antiproliferative and cytotoxic effects of BET inhibition
Source: Springer Nature journal article supplement (doi:10.1007/s00432-022-04018-w), 2022-04-25

# [JQ1] (nM)

**A**

BC

Veh

250

2000

0827

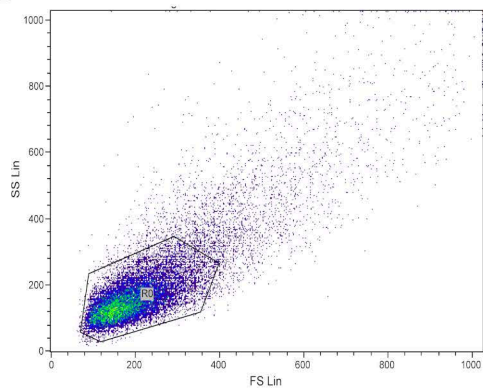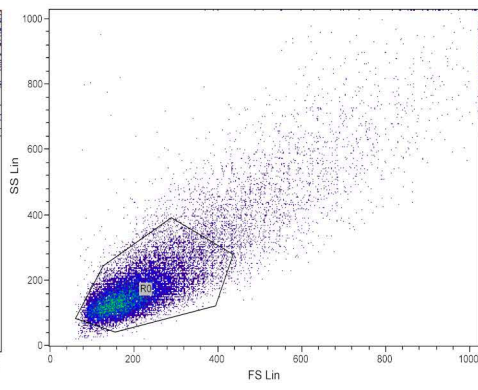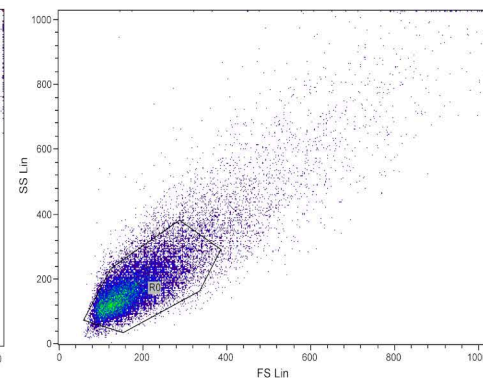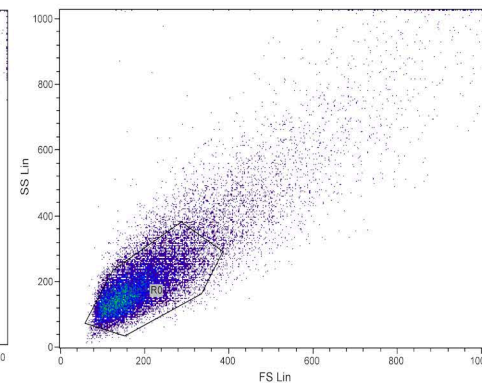

0923

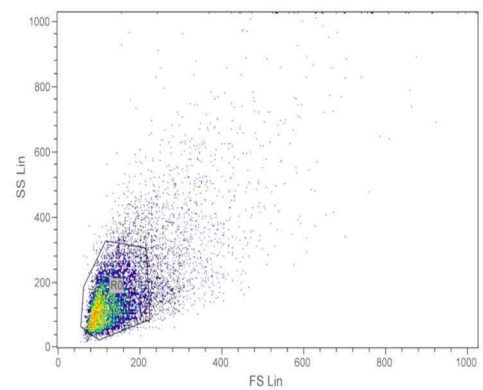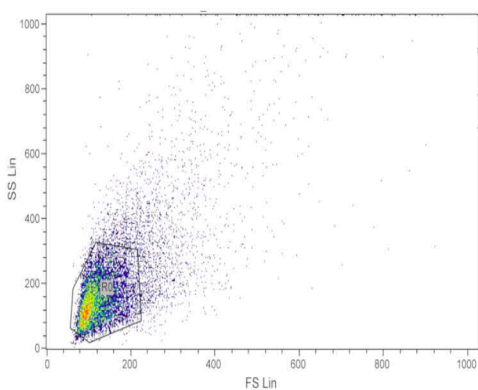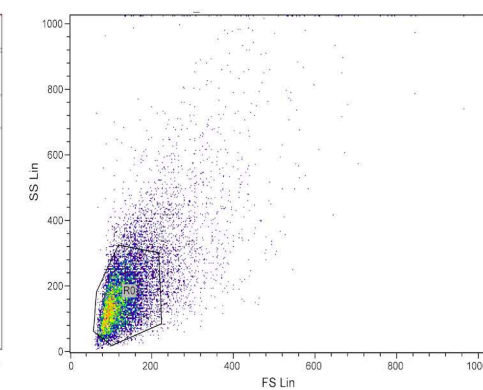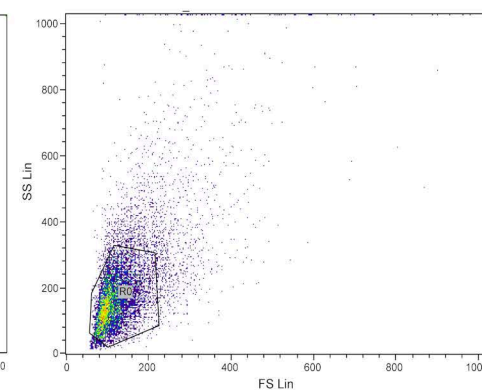

0905

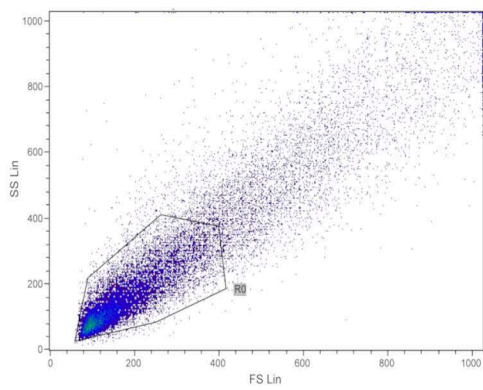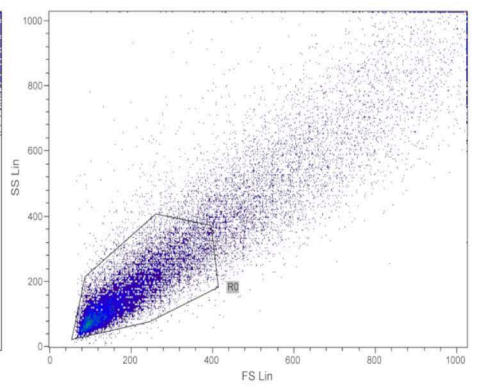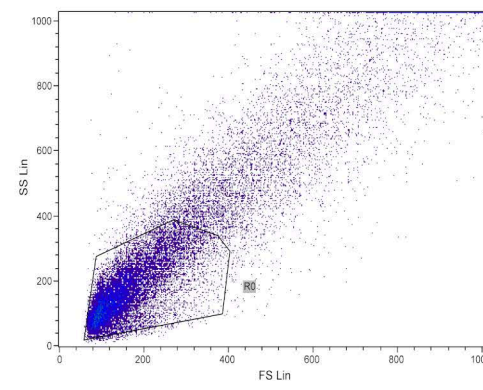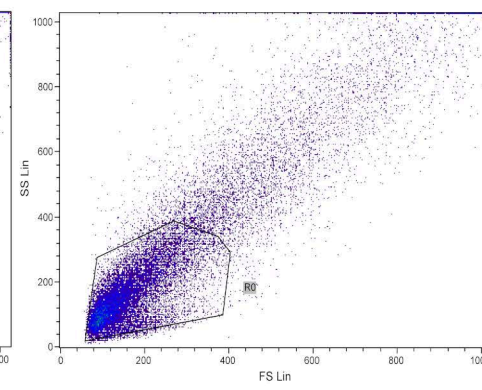

BT142

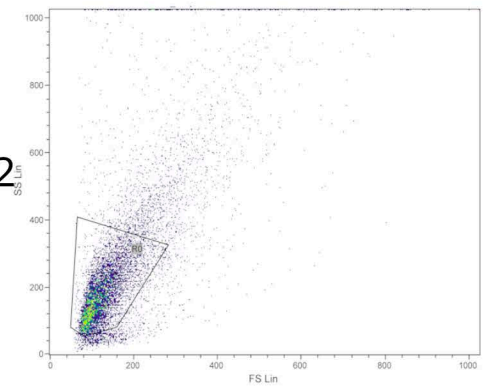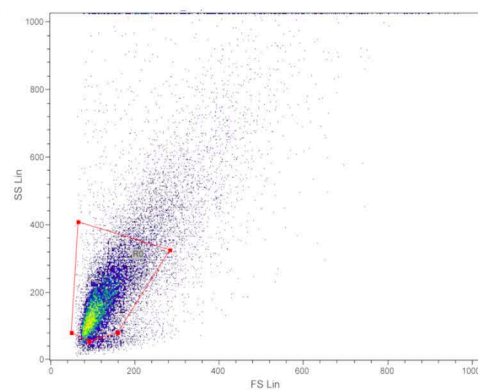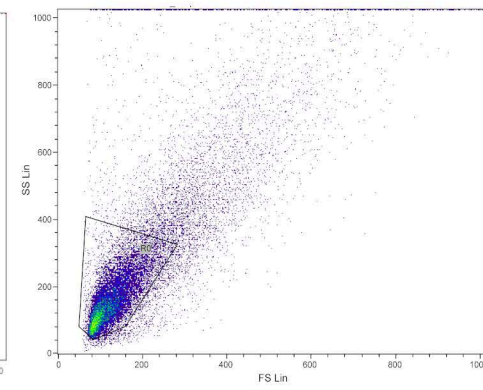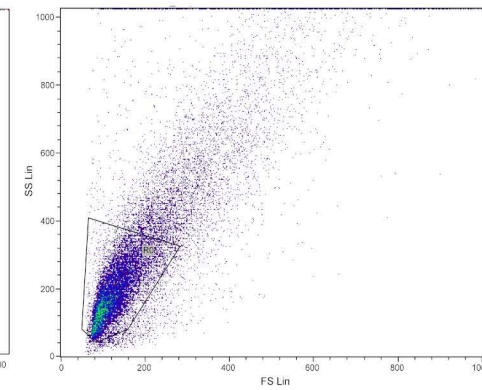

TB096

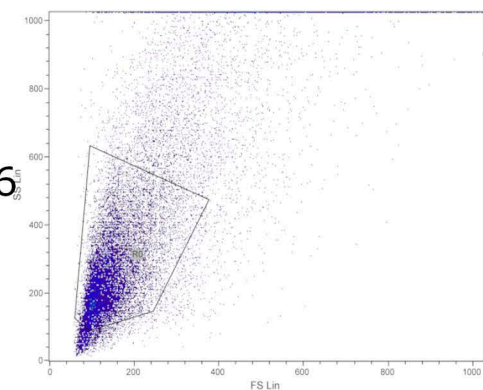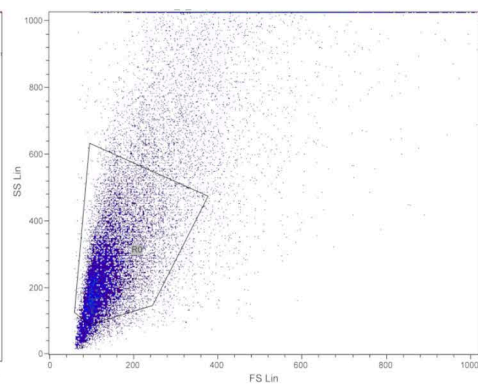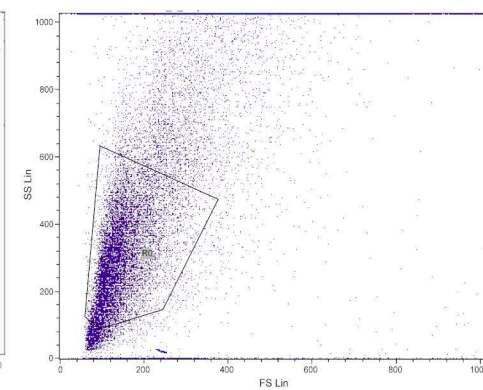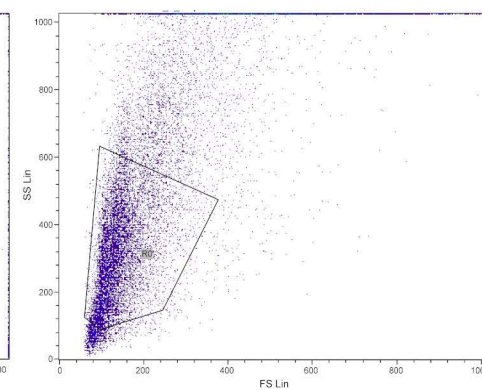

# [JQ1] (nM)

**B**

BC

Veh

250

2000

0827

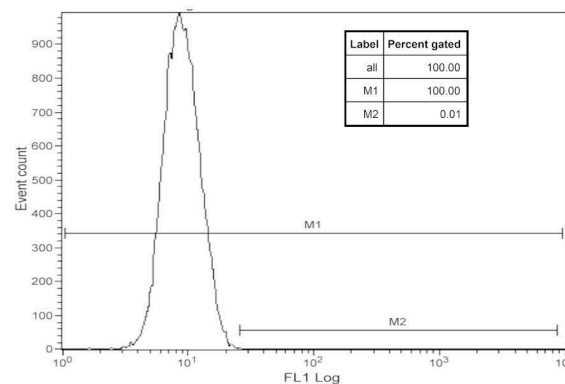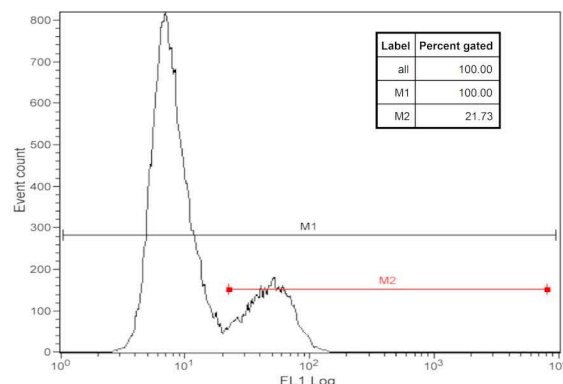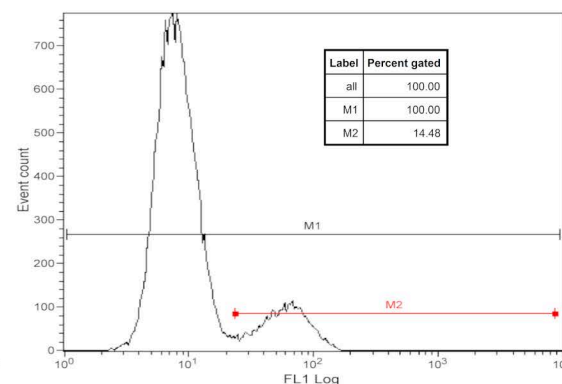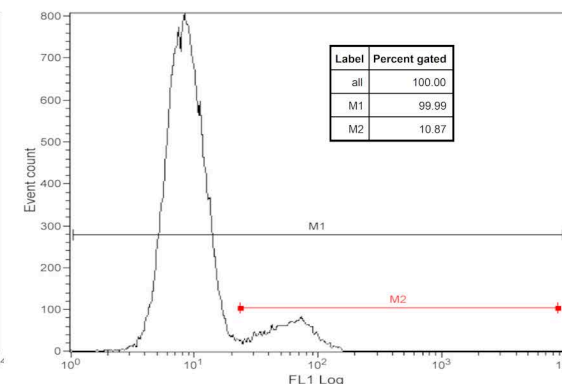

0923

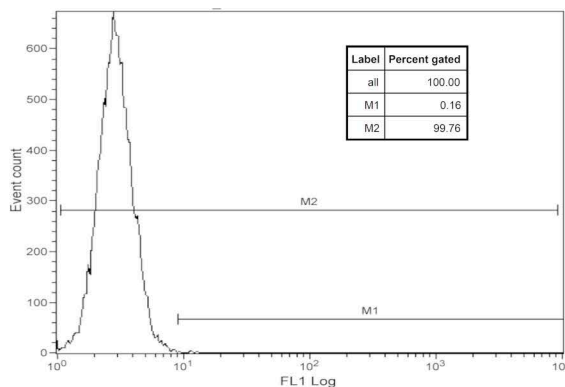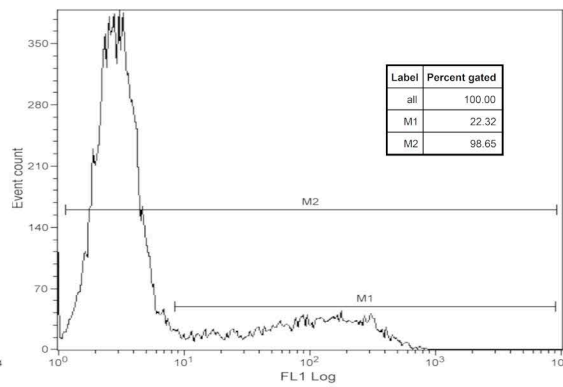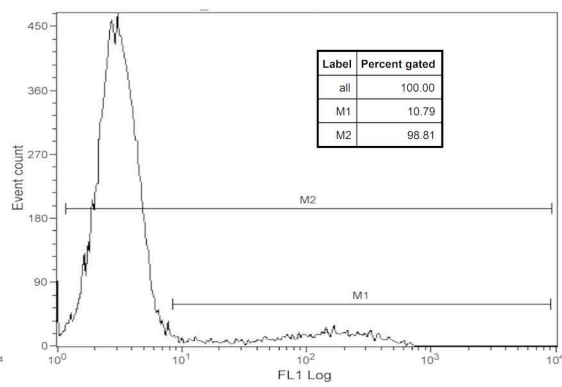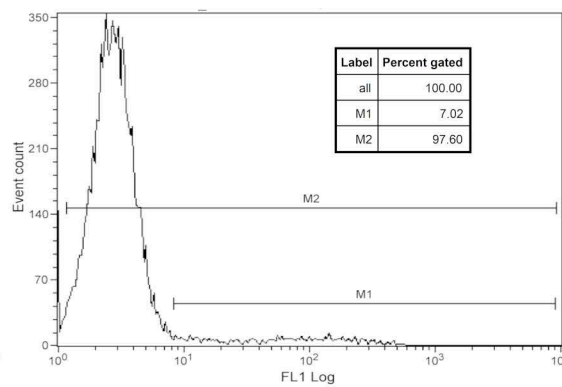

0905

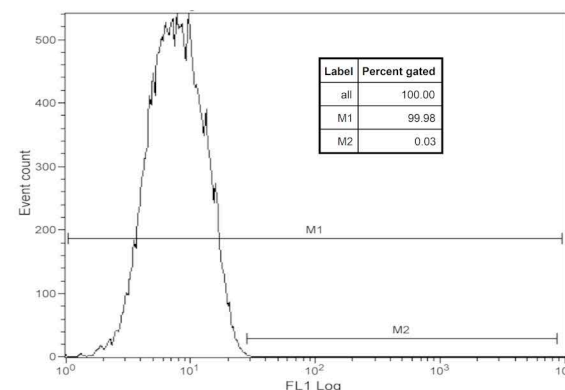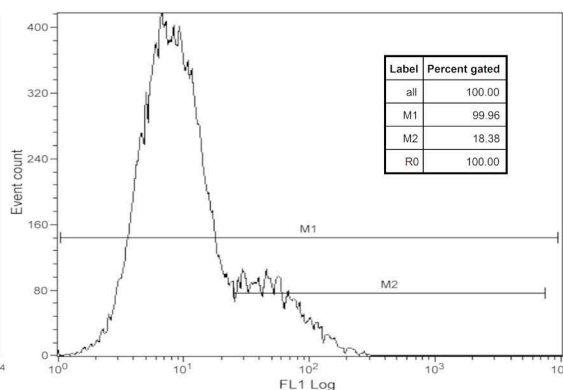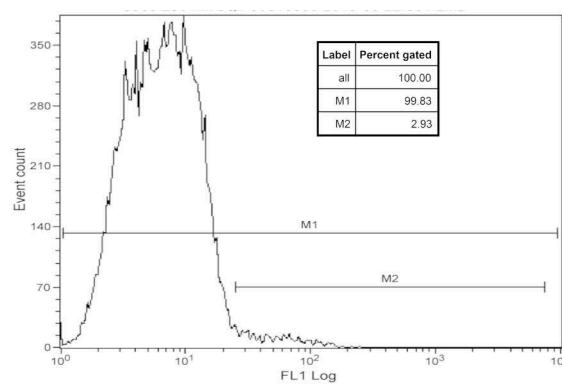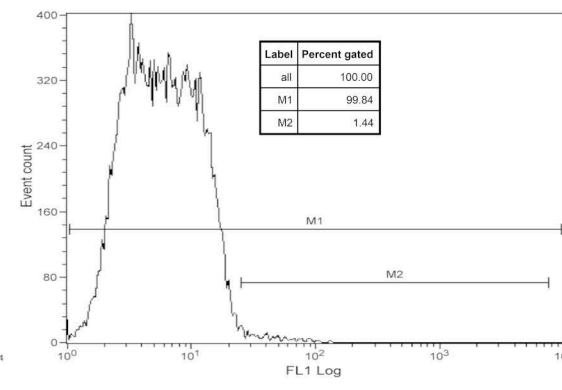

BT142

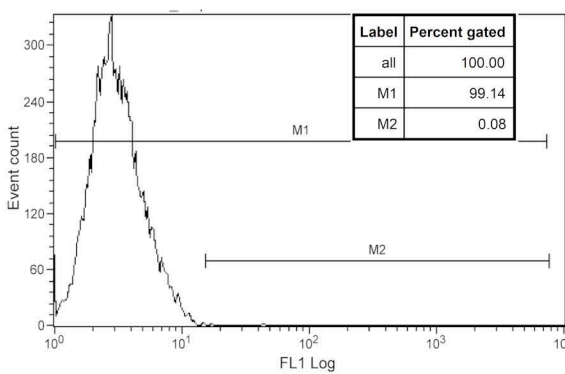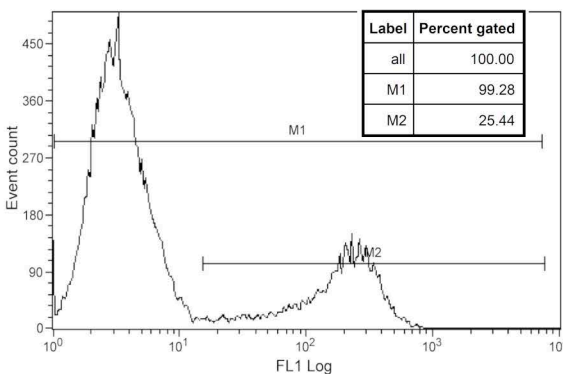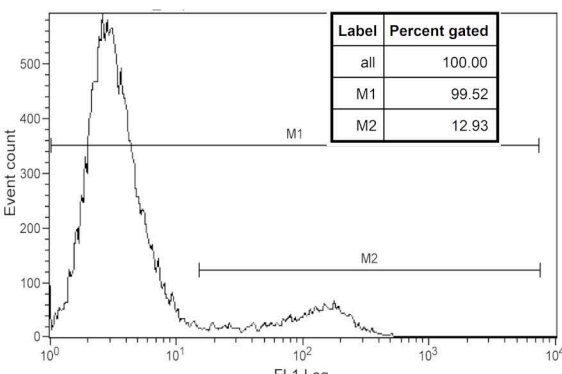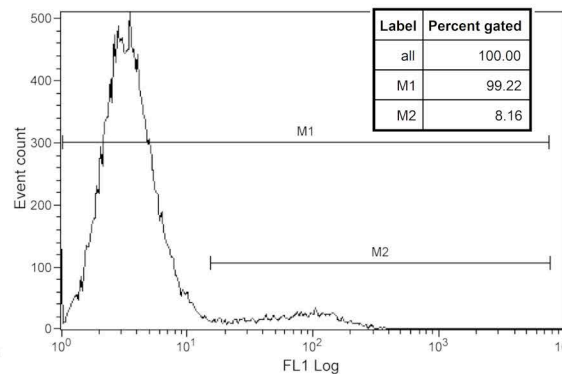

TB096

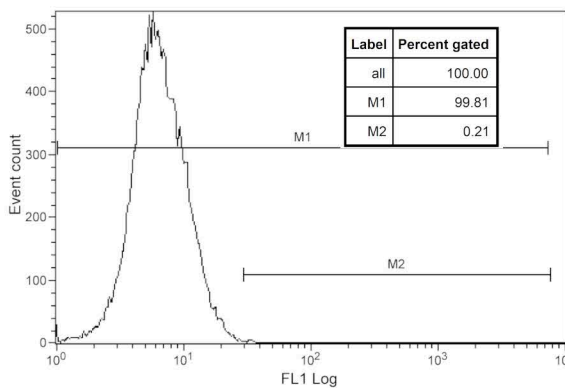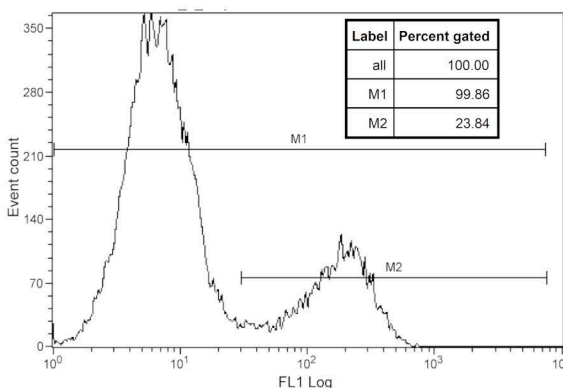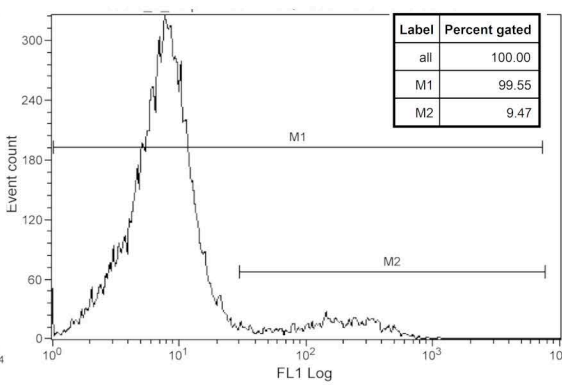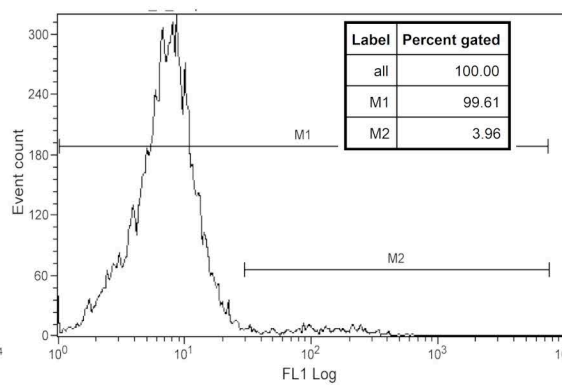

Supplement: MOESM2 [file 20341458]
