# Supplementary material for: R132H IDH1 sensitizes glioma to the antiproliferative and cytotoxic effects of BET inhibition
Source: Springer Nature journal article supplement (doi:10.1007/s00432-022-04018-w), 2022-04-25

# [JQ1] (nM)

Veh

125

250

500

1000

0923-GFP  
-dox

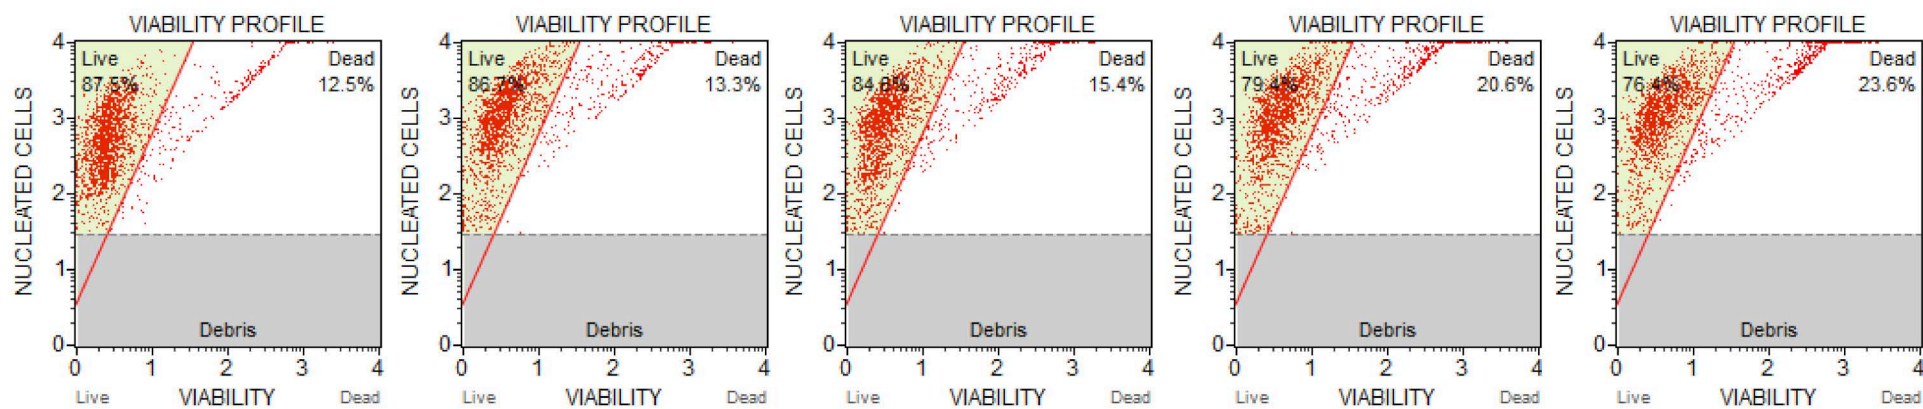

0923-GFP  
+dox

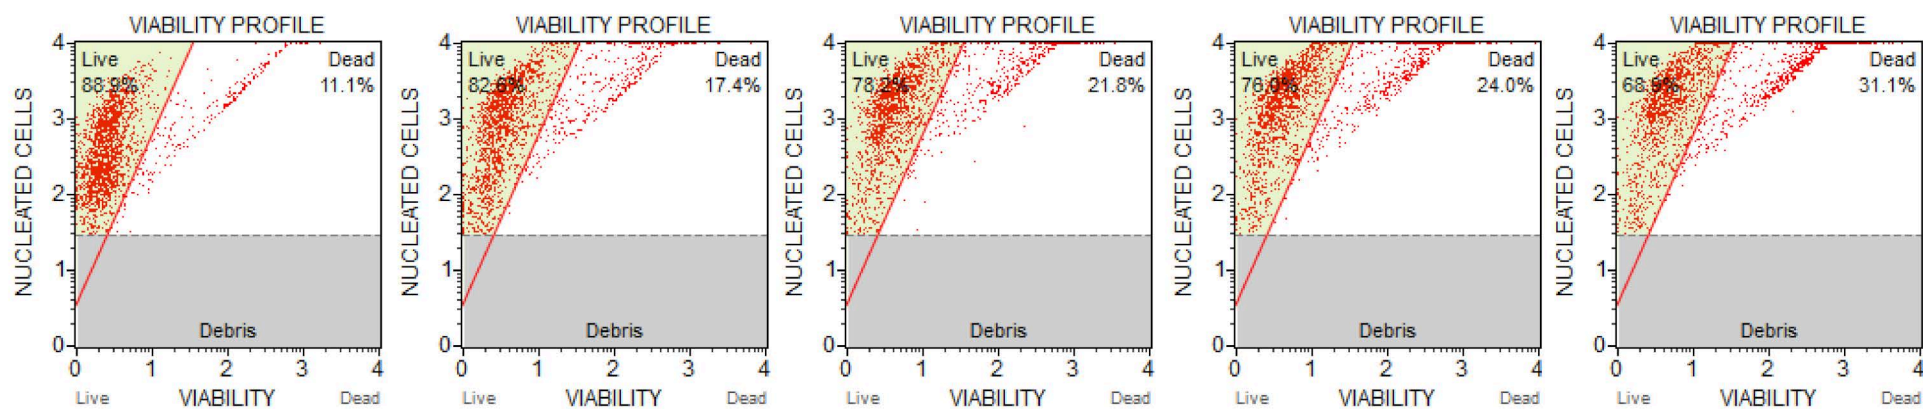

0923-R132H  
-dox

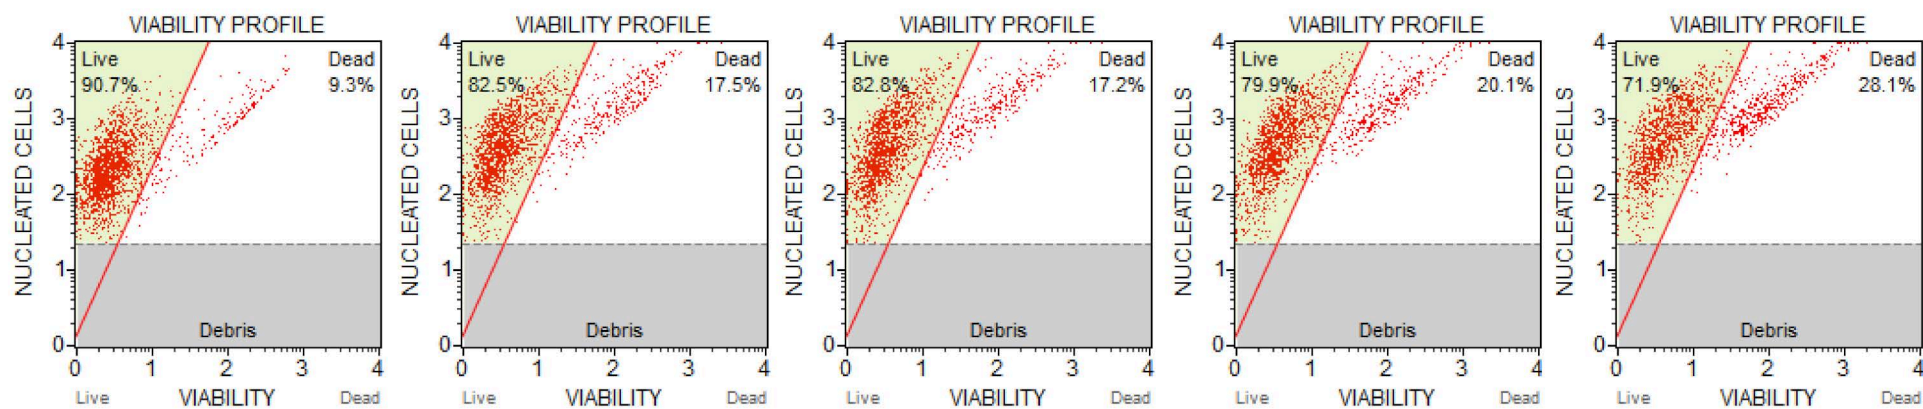

0923-R132H  
+dox

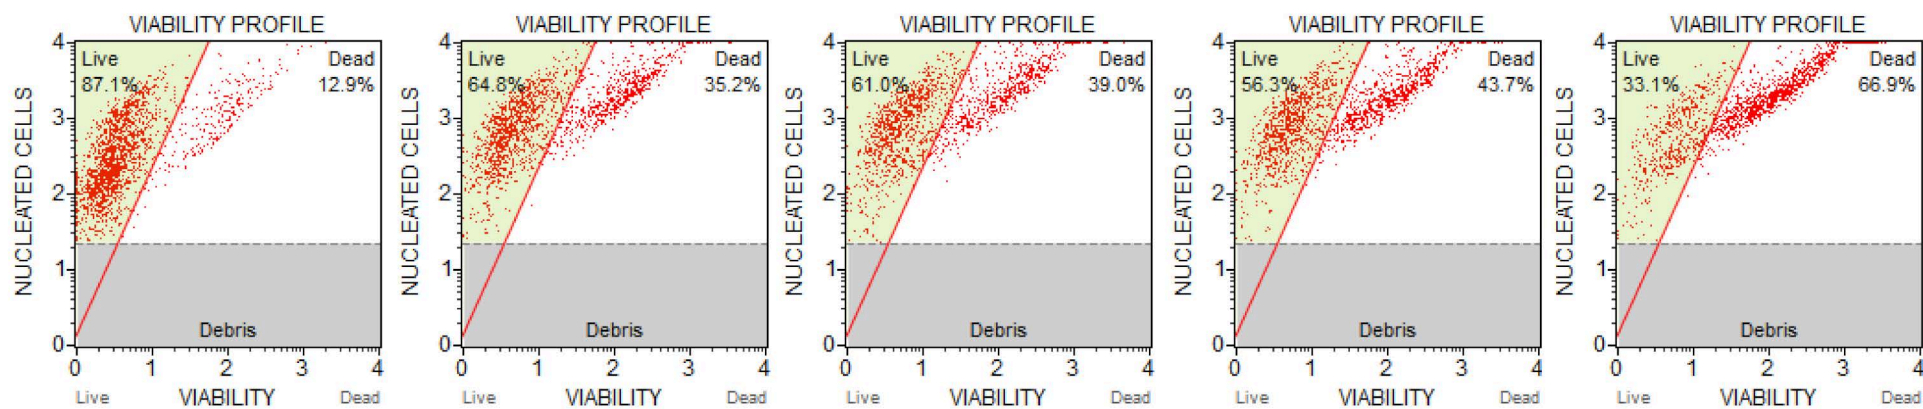

Supplement: MOESM3 [file 20341458]
